# Supplementary material for: Identifying risk zones and landscape features that affect common leopard depredation
Source: PeerJ. 2024 May 31;12:e17497. doi: 10.7717/peerj.17497 (PMC11146323; doi:10.7717/peerj.17497)
Supplement: Supplemental Information 2 [file peerj-12-17497-s002.xlsx]

## Sheet: Sheet1
gpsxinc	gpsyinc
267723	3101909
267452	3101444
267560	3102153
267870	3101040
267769	3100879
267345	3101579
268651	3101902
268639	3101916
268637	3101659
268742	3101858
268742	3101858
267692	3100834
267601	3101889
268429	3101741
268634	3101659
268300	3101709
267882	3102213
267904	3102264
266608	3102992
266673	3102894
266674	3102894
267362	3101653
267354	3101557
267633	3101840
267485	3101405
267735	3102301
267801	3102335
267874	3102343
268382	3102243
267727	3102282
268228	3102023
268396	3102205
268396	3102205
266795	3102556
266262	3101811
266267	3101811
265779	3101984
265731	3102862
266215	3102774
266677	3102700
266819	3102663
266126	3103074
266165	3101918
266020	3103099
266020	3103099
265724	3102647
265901	3102072
265724	3102647
265724	3102647
265783	3101946
265750	3102355
265750	3102355
265755	3102781
266188	3102753
266427	3102876
266627	3102762
266396	3102876
266472	3102762
266472	3102762
266020	3103145
266268	3101811
265746	3102050
266240	3102572
266510	3102703
266493	3102722
266395	3102694
265996	3103146
265988	3103157
266681	3102656
265988	3103157
269305	3102428
268940	3102547
268940	3102547
268762	3102583
268525	3102731
267783	3103370
267824	3103439
267730	3103794
267115	3102877
266157	3101811
266167	3101917
266268	3101811
266853	3101620
266760	3101575
266721	3101680
261305	3102932
266204	3102825
266078	3102780
266104	3102804
266162	3102897
266119	3102784
266731	3103058
266772	3103084
266860	3103102
266892	3103092
267048	3102991
267074	3103070
269228	3103016
269165	3102368
269295	3102855
269300	3102411
269243	3102364
269268	3102160
269019	3102427
268705	3102504
268761	3102481
267445	3102888
267364	3103073
267109	3103082
263354	3103234
268832	3103202
269064	3102915
266020	3103099
268995	3103129
268971	3103170
268429	3102968
268481	3103160
268480	3103163
267834	3103553
268472	310150
267335	3102942
268830	3103202
268839	3103222
268843	3103210
268844	3103217
268866	3103265
269041	3103105
268874	3103234
268437	3102989
268330	3102892
268492	3103174
268462	3103110
267821	3103524
267823	3103647
267720	3103750
264443	3102604
264451	3102609
263984	3101883
264271	3102747
263994	3101920
263998	3101934
264531	3102664
264271	3102747
265589	3102976
265637	3103009
265580	3103037
265397	3102966
265469	3103053
264229	3102641
263992	3101968
270514	3104824
270700	3104971
270697	3104983
271302	3104894
271395	3104902
272043	3104566
271955	3104614
271847	3104627
271641	3104522
271926	3104994
270614	3104795
270692	3104763
270684	3104972
271415	3104883
270529	3104636
272024	3104602
272006	3104670
272075	3104643
272039	3104719
271880	3104702
272041	3104895
272855	3104819
270366	3105372
270815	3105515
270815	3105515
270806	3105503
271074	3105499
270855	3105467
270957	3105519
271460	3105636
271826	3105917
270857	3105391
271595	3105770
270327	3105362
269953	3105758
270178	3105426
269719	3105230
269719	3105230
270234	3105361
270016	3105280
269731	3105614
269750	3105381
269627	310565
269812	3105548
269969	3104993
270236	3105090
270240	3105043
270194	3104998
271847	3104627
272013	3104783
272307	3105624
272235	3105626
271491	3105330
270915	3105360
270605	3105164
270402	3105058
270445	3105010
270817	3105055
273030	3104985
273034	3104985
273036	3104983
273220	3105020
273339	3105163
273345	3105170
273584	3105037
273452	3105104
272140	3105249
273856	3104363
274203	3104461
274279	3104477
274631	3104357
274660	3104310
272210	3105418
272093	3105755
272240	3105399
272174	3105286
272301	3105295
272269	3105380
272339	3105623
272420	3105626
272189	3105765
271899	3105629
271937	3105701
272122	3105935
272287	3105124
272460	3104862
271165	3105375
271165	3105375
270520	3105273
270493	3105263
269959	3104993
269959	3104993
273042	3105026
273108	4105078
272980	3105113
273442	3104863
274051	3104527
274556	3104614
276627	3104179
276627	3104179
275526	3104237
275082	3104197
275039	3104297
276305	3104075
275970	3103947
275991	3103928
276094	3104191
276099	3104185
276083	3104162
275745	3104255
275748	3104153
274896	3104329
274939	3104212
274944	3104212
271987	3105645
272150	3106065
272075	3105979
272157	3105895
272303	3105164
276632	3103920
276679	3103769
276730	3103714
276789	3103743
276889	3103588
276575	3103915
276596	3103919
276756	3104332
276756	3104332
275883	3103972
275883	3103972
275483	3104231
275020	3104263
274910	3104306
274932	3104311
273975	3104400
274011	3104424
274133	3104440
274254	3104463
274590	3104316
